# Supplementary material for: Control of lifespan and survival by Drosophila NF-κB signaling through neuroendocrine cells and neuroblasts
Source: Aging (Albany NY). 2020 Nov 24;12(24):24604–22. doi: 10.18632/aging.104196 (PMC7803524; doi:10.18632/aging.104196)
Supplement: Supplementary Figures [file aging-12-104196-s001.pdf]

## Supplementary Figures

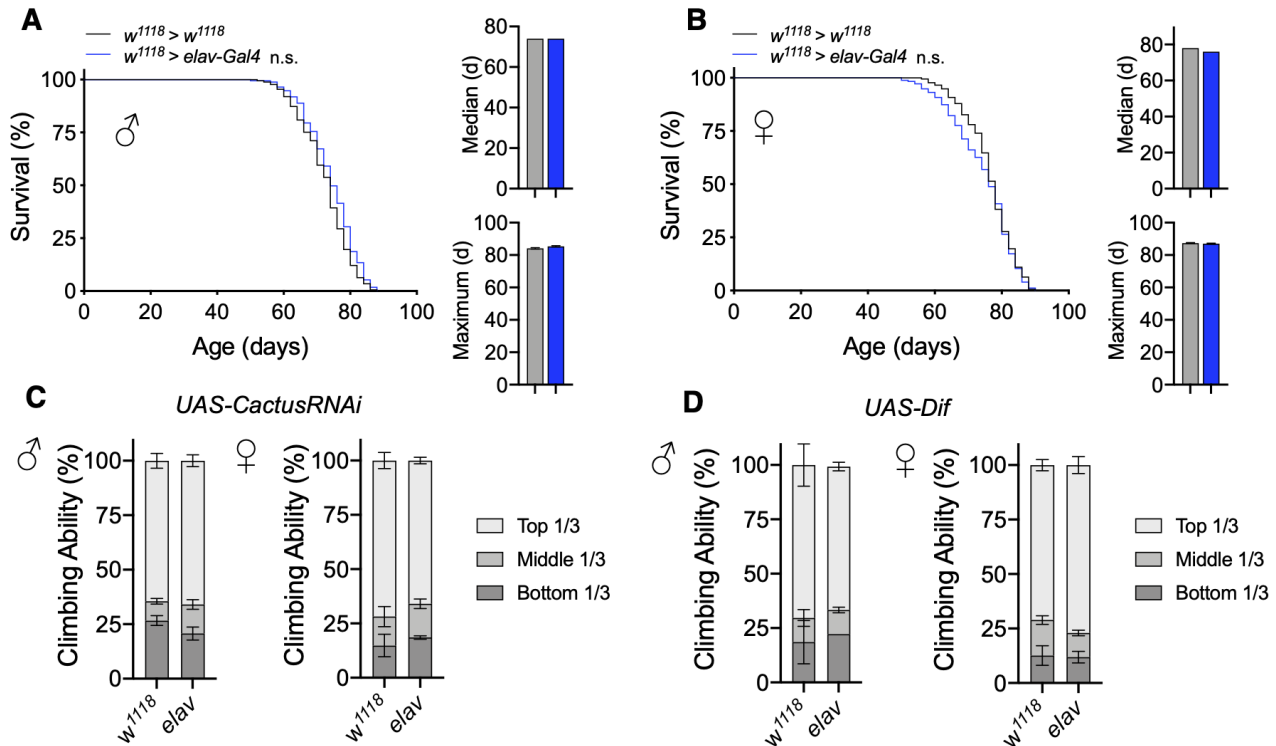

**Supplementary Figure 1. *elav-Gal4* does not affect lifespan.** (A, B) Survival, median lifespan, and 10% max lifespan of  $w^{1118}; elav-Gal4/+$  males (blue) and  $w^{1118}; +/+$  (black) control males (A). Corresponding lifespan analysis for females (B). (C) 10-day negative geotaxis for  $elav-Gal4/UAS-CactusRNAi$  and  $UAS-CactusRNAi/+$  females. (D) 10-day negative geotaxis for  $elav-Gal4/UAS-Dif$  and  $UAS-Dif/+$  females. Data information: statistics for curve comparisons are shown in the figure. Error bars represent mean  $\pm$  s.e.m. n.s. not significant (log-rank test).

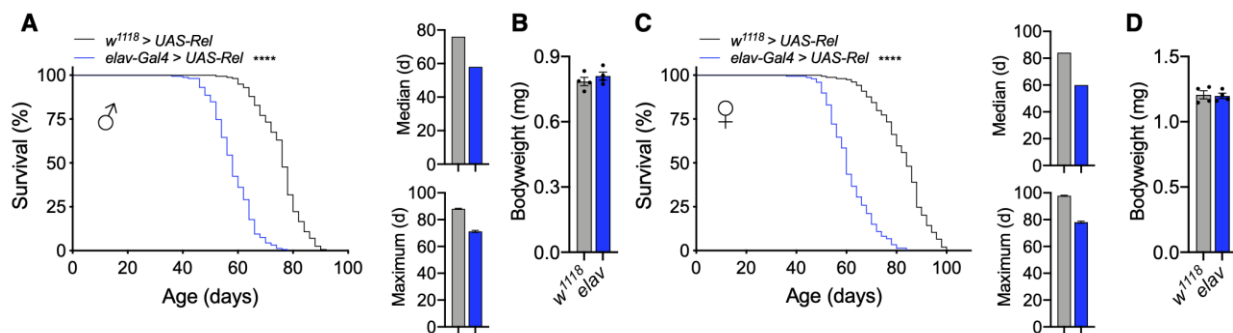

**Supplementary Figure 2. Pan-neuronal constitutive Imd pathway activation shortens lifespan.** (A–D) Survival, median lifespan, and 10% max lifespan (A) and bodyweight (B) of  $elav-Gal4/UAS-Rel$  males (blue) and  $UAS-Rel/+$  (black) control males. Corresponding lifespan analysis (C) and bodyweight (D) for females. Data information: statistics for curve comparisons are shown in the figure. Error bars represent mean  $\pm$  s.e.m. \*\*\*\*  $p < .0001$  (log-rank test).

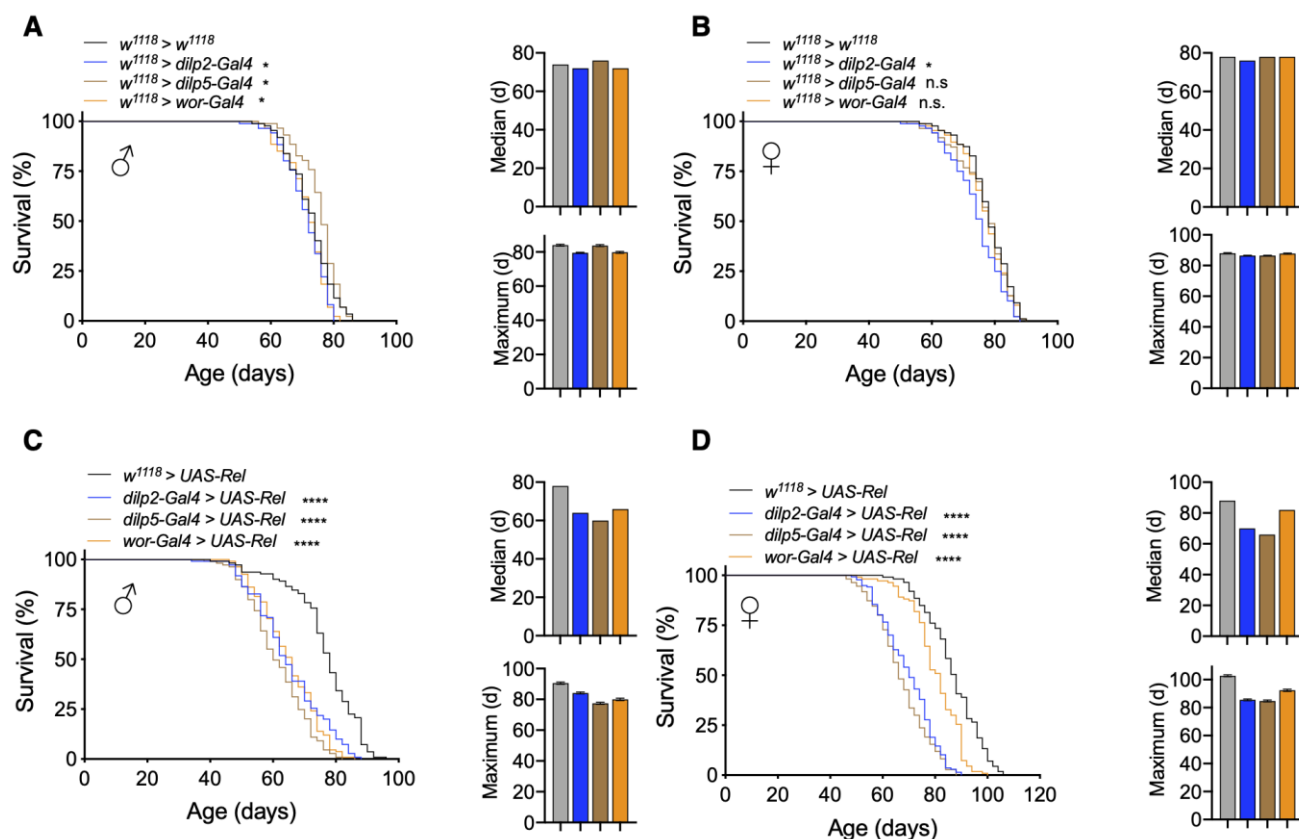

**Supplementary Figure 3. Constitutive Imd pathway activation in IPCs or neuroblasts shortens lifespan.** (A, B) Survival, median lifespan, and 10% max lifespan of *w<sup>1118</sup>;dilp2-Gal4/+* males (blue), *w<sup>1118</sup>;dilp5-Gal4/+* males (brown), *w<sup>1118</sup>;wor-Gal4/+* males (orange), and *w<sup>1118</sup>;+/+* (black) control males (A). Corresponding lifespan analysis for females (B). (C, D) Survival, median lifespan, and 10% max lifespan of *dilp2-Gal4/UAS-Rel* males (blue), *dilp5-Gal4/UAS-Rel* males (orange), *wor-Gal4/UAS-Rel* males (brown), and *UAS-Rel/+* (black) control males (C). Corresponding lifespan analysis for females (D). Data information: statistics for curve comparisons are shown in the figure. Error bars represent mean  $\pm$  s.e.m., n.s. not significant, \*  $p < .05$ , \*\*\*\*  $p < .0001$  (log-rank test).

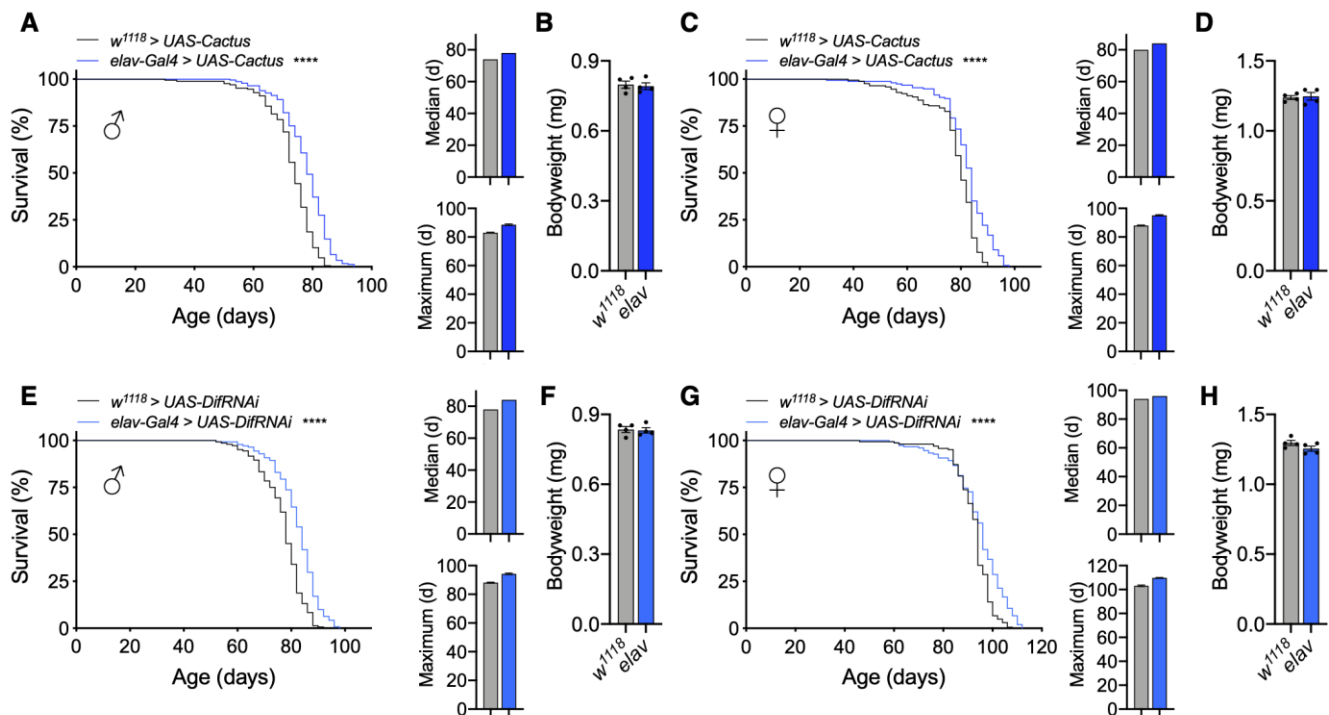

**Supplementary Figure 4. Pan-neuronal Toll pathway inhibition modestly increases lifespan.** (A, D) Survival, median lifespan, and 10% max lifespan (A) and bodyweight (B) of *UAS-Cactus/+;elav-Gal4/+* males (blue) and *UAS-Cactus/+;+/+* (black) control males. Corresponding lifespan analysis (C) and bodyweight (D) for females. (E–H) Survival, median lifespan, and 10% max lifespan (E) and bodyweight (F) of *UAS-DifRNAi/elav-Gal4* males (blue) and *UAS-DifRNAi/+* (black) control males. Corresponding lifespan analysis (G) and bodyweight (H) for females. Data information: statistics for curve comparisons are shown in the figure. Error bars represent mean  $\pm$  s.e.m. \*\*\*\* p < 0.0001 (log-rank test).

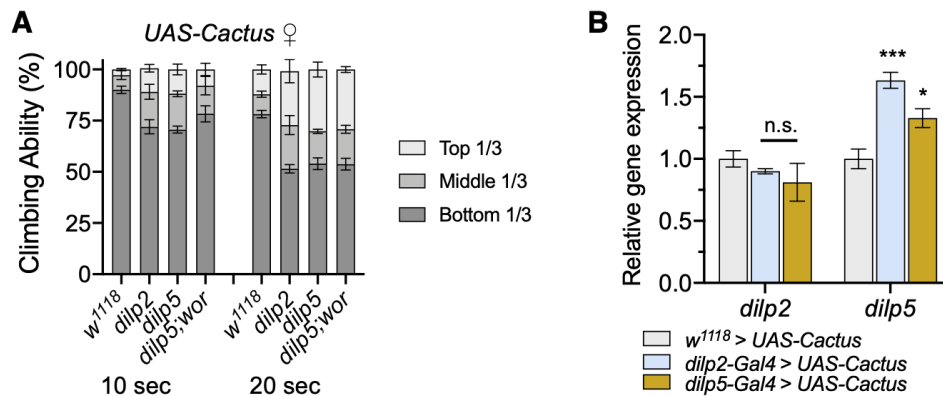

**Supplementary Figure 5. Toll pathway inhibition in IPCs increases climbing ability.** (A) 70-day negative geotaxis for *dilp2-Gal4/UAS-Cactus*, *dilp5-Gal4/UAS-Cactus*, *dilp5-Gal4;wor-Gal4/UAS-Cactus*, and *UAS-Cactus/+* females. (B) Gene expression for *dilp2* and *dilp5* in flies with Cactus overexpression in IPCs versus controls (n = 4). Data information: statistics for curve comparisons are shown in the figure. Error bars represent mean  $\pm$  s.e.m. n.s., not significant, \* p < 0.01, \*\*\* p < 0.001.
